# Supplementary material
Source: PubMed Central journal article supplement (PMC3144382)

(A)

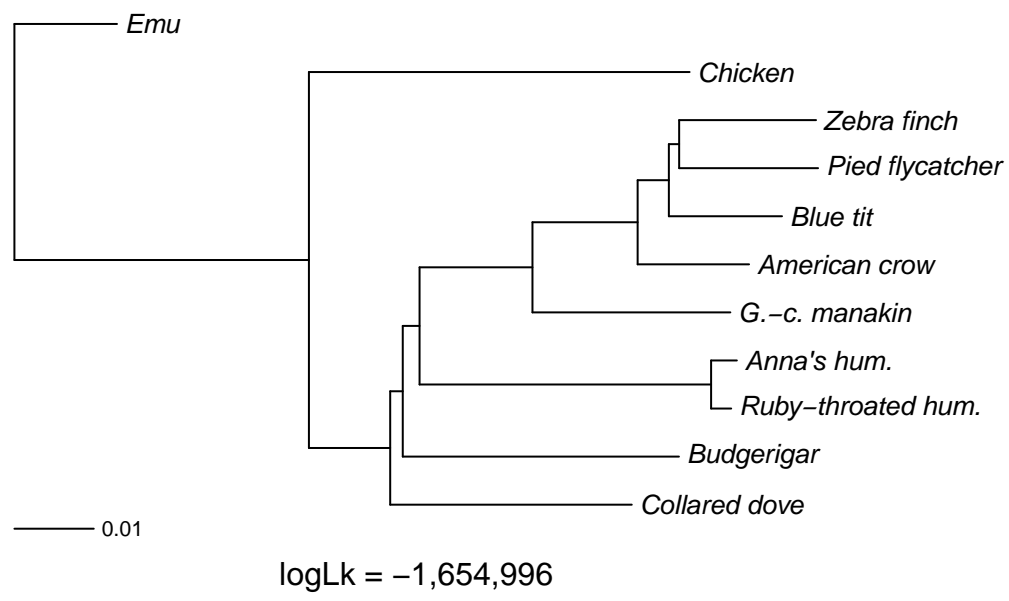

(D)

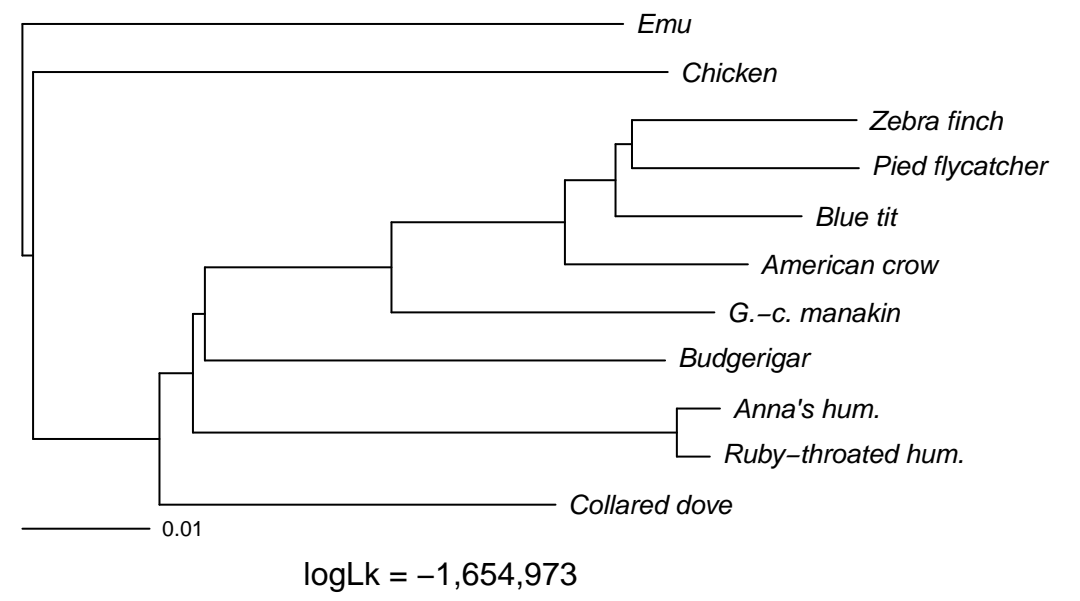

(B)

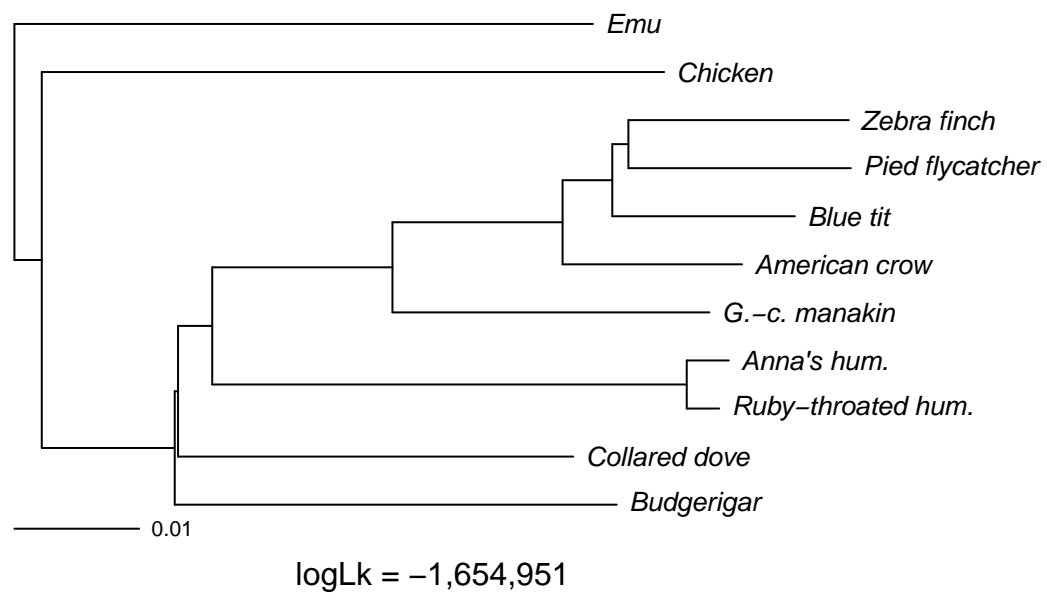

(E)

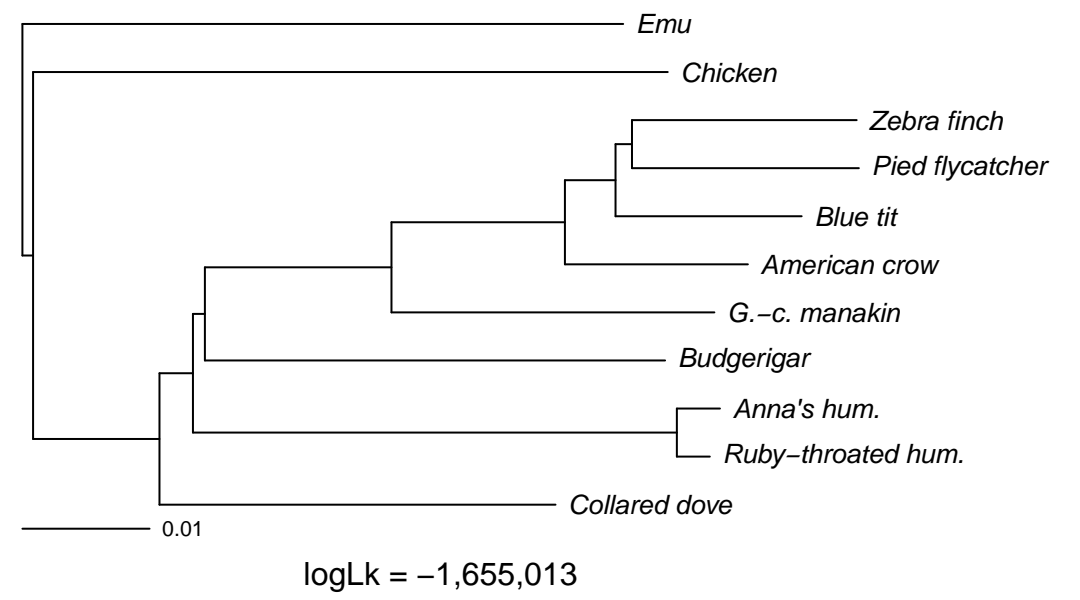

(C)

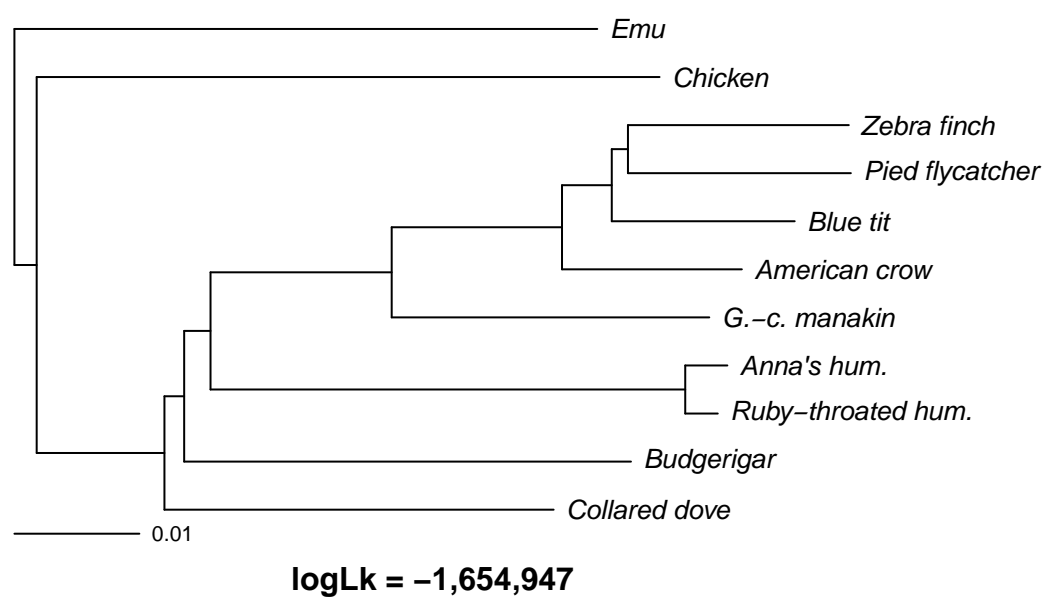

Supplement: supp_msr047_Figure_S1.pdf [file supp_msr047_Figure_S1.pdf]
